# Supplementary material for: The Sorption of Sulfamethoxazole by Aliphatic and Aromatic Carbons from Lignocellulose Pyrolysis
Source: MDPI journal article supplement (doi:10.3390/agronomy12020476), 2022-02-14
Supplement: s1 [file s1]

## Supplementary Material

### **The sorption of sulfamethoxazole by aliphatic and aromatic carbons from lignocellulose pyrolysis**

Gang Chu <sup>a,\*</sup>, Zifeng Han <sup>a</sup>, Zimo Wang <sup>a</sup>, Defeng Kong <sup>a</sup>, Wenxiu Qin <sup>a</sup>, Youbin Si <sup>a,\*</sup>,

Guozhong Wang <sup>b</sup>, Christian E.W. Steinberg <sup>c</sup>

<sup>a</sup> *Anhui Province Key Laboratory of Farmland Ecological Conservation and Pollution Prevention,*

*Faculty of Resources and Environment, Anhui Agricultural University, Hefei 230036, Anhui, China*

<sup>b</sup> *Key Laboratory of Materials Physics, Centre for Environmental and Energy Nanomaterials, Institute*

*of Solid State Physics, Chinese Academy of Sciences, Hefei, 230031, China*

<sup>c</sup> *Faculty of Life Sciences, Institute of Biology, Freshwater & Stress Ecology, Humboldt-University at*

*Berlin, Arboretum, Späthstr. 80/81, 12437 Berlin, Germany*

\*Corresponding author,

Gang Chu (Ph. D.), E-mail: gangchu@aliyun.com;

Youbin Si (Ph. D., Prof.), E-mail: youbinsi@ahau.edu.cn;

## Figures

**Figure S1**

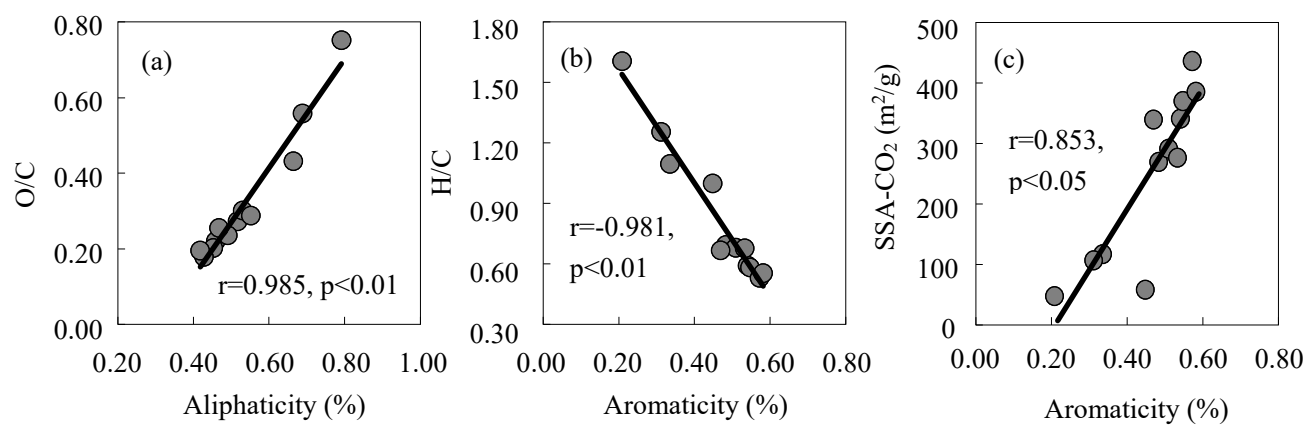

**Figure S1.** The correlation between O/C and aliphaticity (a), H/C and aromaticity (b), SSA-CO<sub>2</sub> and aromaticity (c) for biochars produced from BA, PS, CE and LI.

**Figure S2**

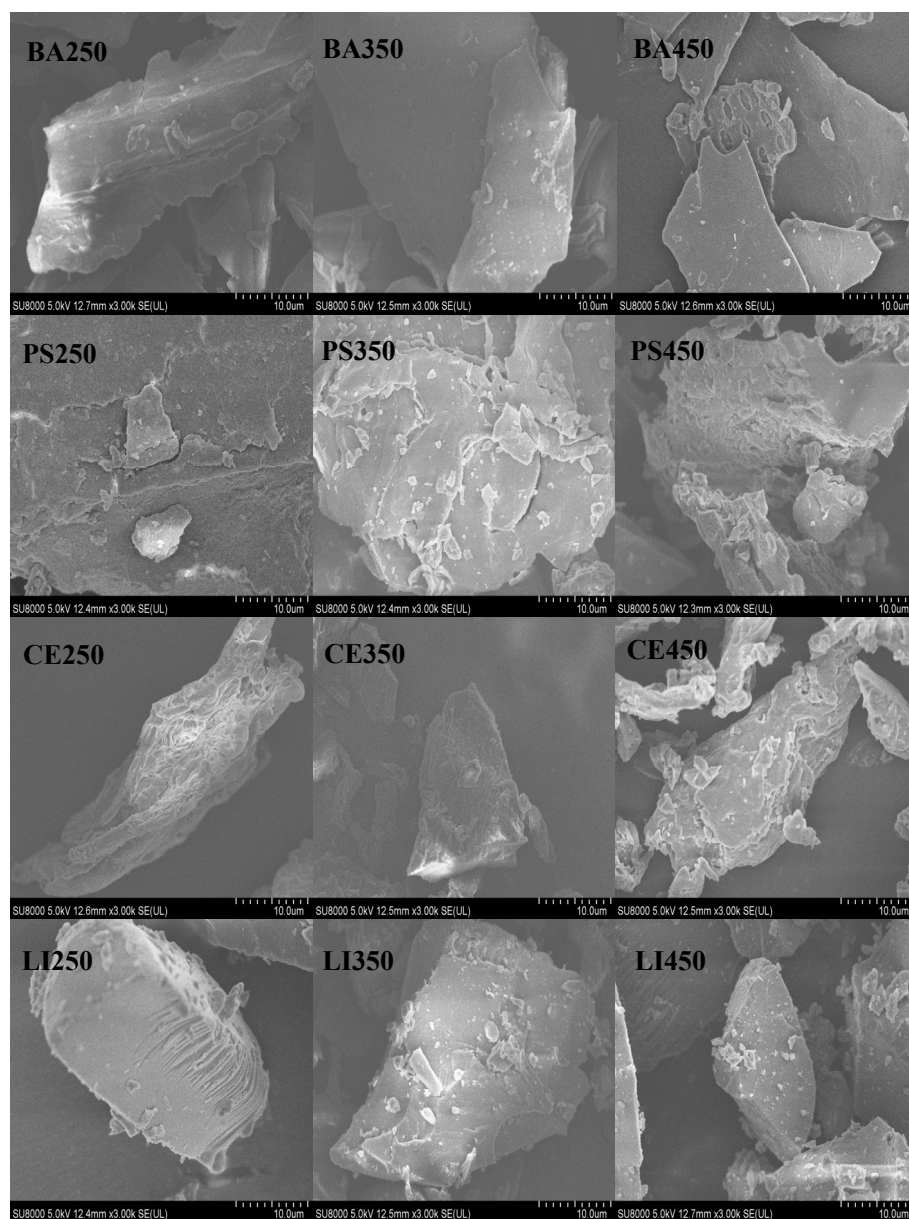

**Figure S2.** Scanning electron microscope (SEM) images of biochars from BA, PS, CE and LI, respectively.

## Tables

**Table S1.** The content of cellulose, hemicellulose and lignin in precursor biomasses according to the literatures.

| Biomass | Cellulose | Hemicellulose | Lignin | Literatures |
|---------|-----------|---------------|--------|-------------|
| PS      | 48.6%     | 10.5%         | 25.3%  | [23]        |
| BA      | 42.2%     | 27.6%         | 21.6%  | [24]        |

**Table S2.** Selected physico-chemical properties of SMX.

| Sorbate | Chemical                                                        | M <sup>a</sup> | pK <sub>a</sub> | logK <sub>ow</sub>                 | Molecular structure | Species distribution                                                                |
|---------|-----------------------------------------------------------------|----------------|-----------------|------------------------------------|---------------------|-------------------------------------------------------------------------------------|
| s       | Formula                                                         | (g/mol)        | <sup>b</sup>    | C <sub>s</sub> <sup>c</sup> (mg/L) | <sup>d</sup>        |                                                                                     |
| SMX     | C <sub>10</sub> H <sub>11</sub> N <sub>3</sub> O <sub>3</sub> S | 253.3          | 1.7<br>5.7      | 365                                | 0.48                | 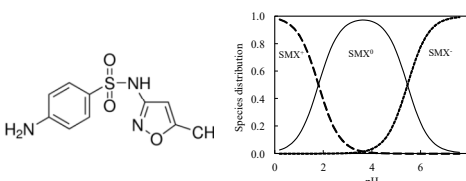 |

**Table S3.** The titration results of acidic groups of biochars.

| Content (μmol/g) | BA250 | BA350 | BA450 | PS250 | PS350 | PS450 |
|------------------|-------|-------|-------|-------|-------|-------|
| Acidity          | 0.079 | 0.073 | 0.055 | 0.054 | 0.050 | 0.030 |
| carboxyl         | 0.037 | 0.038 | 0.034 | 0.032 | 0.033 | 0.027 |
| phenol           | 0.042 | 0.035 | 0.021 | 0.022 | 0.017 | 0.003 |
| Content (μmol/g) | CE250 | CE350 | CE450 | LI250 | LI350 | LI450 |
| Acidity          | 0.067 | 0.071 | 0.054 | 0.029 | 0.029 | 0.025 |
| carboxyl         | 0.035 | 0.033 | 0.036 | 0.024 | 0.023 | 0.021 |
| phenol           | 0.032 | 0.038 | 0.018 | 0.005 | 0.006 | 0.003 |

**Table S4.** Fitting results of sorption isotherms of SMX on various biochars.

| Samples | pH   | Freundlich model            |      |                               | K <sub>d</sub> <sup>b</sup><br>(0.1C <sub>s</sub> ) | Dubinin-Astakhov model |            |      |                               |
|---------|------|-----------------------------|------|-------------------------------|-----------------------------------------------------|------------------------|------------|------|-------------------------------|
|         |      | K <sub>F</sub> <sup>a</sup> | n    | R <sub>adj</sub> <sup>2</sup> |                                                     | Q <sup>0</sup> (mg/g)  | E (kJ/mol) | b    | R <sub>adj</sub> <sup>2</sup> |
| GAN250  | 4.00 | 0.81                        | 0.49 | 0.85                          | 0.13                                                | 1.77                   | 9.99       | 2.76 | 0.96                          |
|         | 7.00 | 0.54                        | 0.54 | 0.92                          | 0.10                                                | 2.02                   | 7.27       | 1.54 | 0.98                          |
| GAN350  | 4.00 | 0.21                        | 0.81 | 0.99                          | 0.11                                                | -                      | -          | -    | -                             |
|         | 7.00 | 0.33                        | 0.36 | 0.87                          | 0.03                                                | 0.36                   | 11.04      | 2.51 | 0.88                          |

|        |      |      |      |      |      |      |       |      |      |
|--------|------|------|------|------|------|------|-------|------|------|
| GAN450 | 4.00 | 1.04 | 0.81 | 1.00 | 0.52 | 5.17 | 2.36  | 0.90 | 0.95 |
|        | 7.00 | 0.73 | 0.40 | 0.90 | 0.08 | 1.38 | 10.43 | 2.04 | 0.93 |
| WD250  | 4.00 | 0.28 | 0.67 | 0.98 | 0.08 | 1.95 | 6.45  | 1.52 | 0.99 |
|        | 7.00 | 0.26 | 0.52 | 0.91 | 0.05 | 1.18 | 7.52  | 1.65 | 0.98 |
| WD350  | 4.00 | 0.40 | 0.46 | 0.84 | 0.06 | 1.35 | 7.92  | 1.56 | 0.91 |
|        | 7.00 | 0.17 | 0.40 | 0.93 | 0.02 | -    | -     | -    | -    |
| WD450  | 4.00 | 0.44 | 0.60 | 0.98 | 0.10 | 2.90 | 3.56  | 0.94 | 0.98 |
|        | 7.00 | 0.30 | 0.34 | 0.89 | 0.03 | 0.18 | 11.71 | 2.46 | 0.97 |
| CE250  | 4.00 | 0.37 | 0.73 | 0.98 | 0.14 | 3.09 | 4.12  | 1.14 | 0.99 |
|        | 7.00 | 0.33 | 0.58 | 0.97 | 0.07 | 1.48 | 8.13  | 1.91 | 0.97 |
| CE350  | 4.00 | 0.16 | 0.72 | 0.98 | 0.06 | 2.00 | 4.88  | 1.30 | 0.99 |
|        | 7.00 | 0.11 | 0.42 | 0.95 | 0.01 | -    | -     | -    | -    |
| CE450  | 4.00 | 0.08 | 0.89 | 0.97 | 0.05 | 2.83 | 2.58  | 1.00 | 0.99 |
|        | 7.00 | 0.09 | 0.49 | 0.90 | 0.01 | -    | -     | -    | -    |
| LI250  | 4.00 | 0.05 | 0.66 | 0.94 | 0.01 | 0.21 | 6.13  | 1.62 | 0.94 |
|        | 7.00 | 0.03 | 0.70 | 0.80 | 0.01 | 0.28 | 4.92  | 1.35 | 0.94 |
| LI350  | 4.00 | 0.14 | 0.46 | 0.82 | 0.02 | 0.19 | 8.82  | 1.92 | 0.95 |
|        | 7.00 | 0.08 | 0.50 | 0.93 | 0.01 | -    | -     | -    | -    |
| LI450  | 4.00 | 0.05 | 0.62 | 0.83 | 0.01 | -    | -     | -    | -    |
|        | 7.00 | 0.04 | 0.62 | 0.83 | 0.01 | 0.20 | 5.76  | 1.61 | 0.92 |

<sup>a</sup>  $K_F$  [(mg/g)/(mg/L)<sup>n</sup>]; <sup>b</sup> sorption coefficient calculated at 0.1C<sub>s</sub>;
